# Supplementary material for: Pan-genome analysis of Bacillus for microbiome profiling
Source: PubMed Central journal article supplement (PMC5591210; doi:10.1038/s41598-017-11385-9), 2017-09-08
Supplement: 41598_2017_11385_MOESM1_ESM.pdf [file 41598_2017_11385_MOESM1_ESM.pdf]

## Pan-genome analysis of *Bacillus* for microbiome profiling

Yihwan Kim<sup>1,+</sup>, InSong Koh<sup>1,2,+</sup>, Mi Young Lim<sup>3</sup>, Won-Hyong Chung<sup>3</sup>, and Mina Rho<sup>1,4\*</sup>

<sup>1</sup>Department of Biomedical Informatics, Hanyang University, Seoul, Korea

<sup>2</sup>Department of Physiology, Hanyang University, Seoul, Korea

<sup>3</sup>Research Group of Gut Microbiome, Korea Food Research Institute, Seongnam, Gyeonggi-do, Korea

<sup>4</sup>Department of Computer Science and Engineering, Hanyang University, Seoul, Korea

<sup>+</sup> Equal Contributors

\*Correspondence: [minarho@hanyang.ac.kr](mailto:minarho@hanyang.ac.kr)

## Supplementary Figure Legend

**Supplementary Figure S1.** Number of the core genes (top) and their average similarities in the orthologous gene cluster (bottom). Clustering thresholds ranges from 50% to 90% in different color.

**Supplementary Figure S2.** Pan-genomes in five *Bacillus* species. (A) Total number of orthologous gene clusters with respect to the number of strains in a cluster. (B) Sequence similarity distribution of genes in each cluster of *B. amyloliquefaciens* with respect to the number of strains in a cluster.

**Supplementary Figure S3.** Comparison of the genomic signatures (containing PC3) in core and strain-specific genes of *Bacillus* species.

**Supplementary Figure S4.** Identification of *Bacillus* species in the *doenjang* microbiome. Phylogenetic trees of three *Bacillus* genes of (A) *pgsA*, (B) *pgsB*, (C) *pgsC* genes in five microbiomes D4, D9, D13, D15, and D16, along with the genes in the reference genomes.

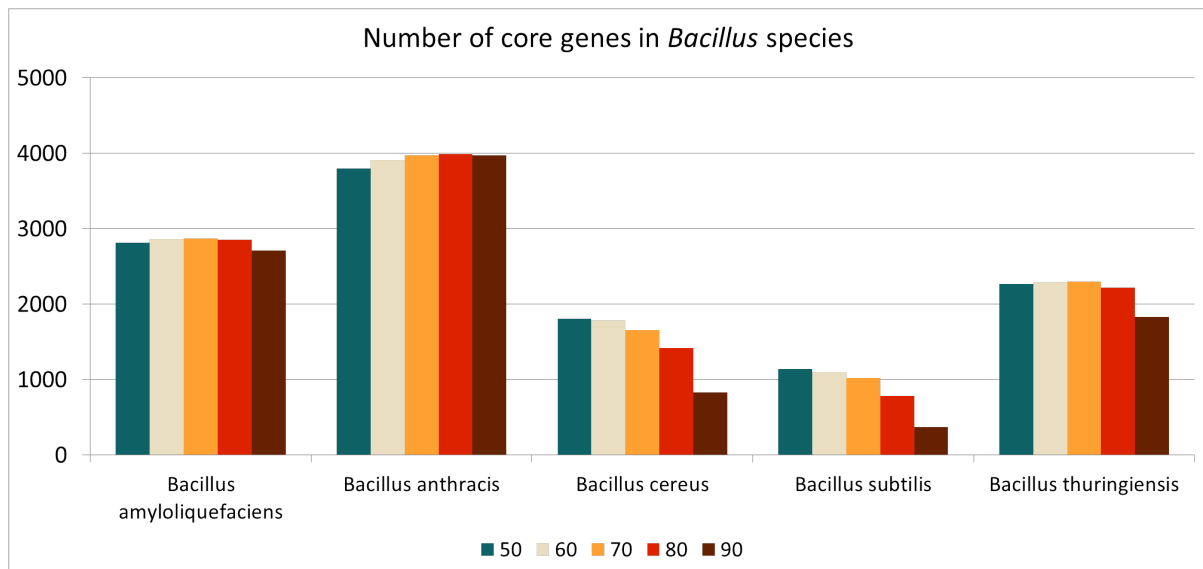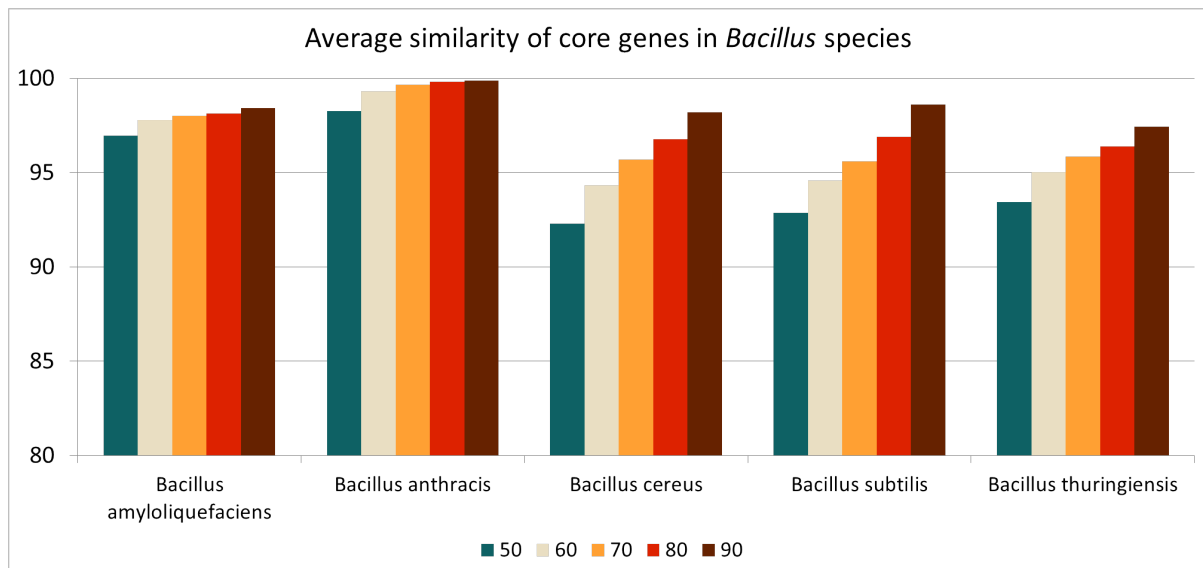

**Supplementary Figure S1.** Number of the core genes (top) and their average similarities in the orthologous gene cluster (bottom). Clustering thresholds ranges from 50% to 90% in different color.

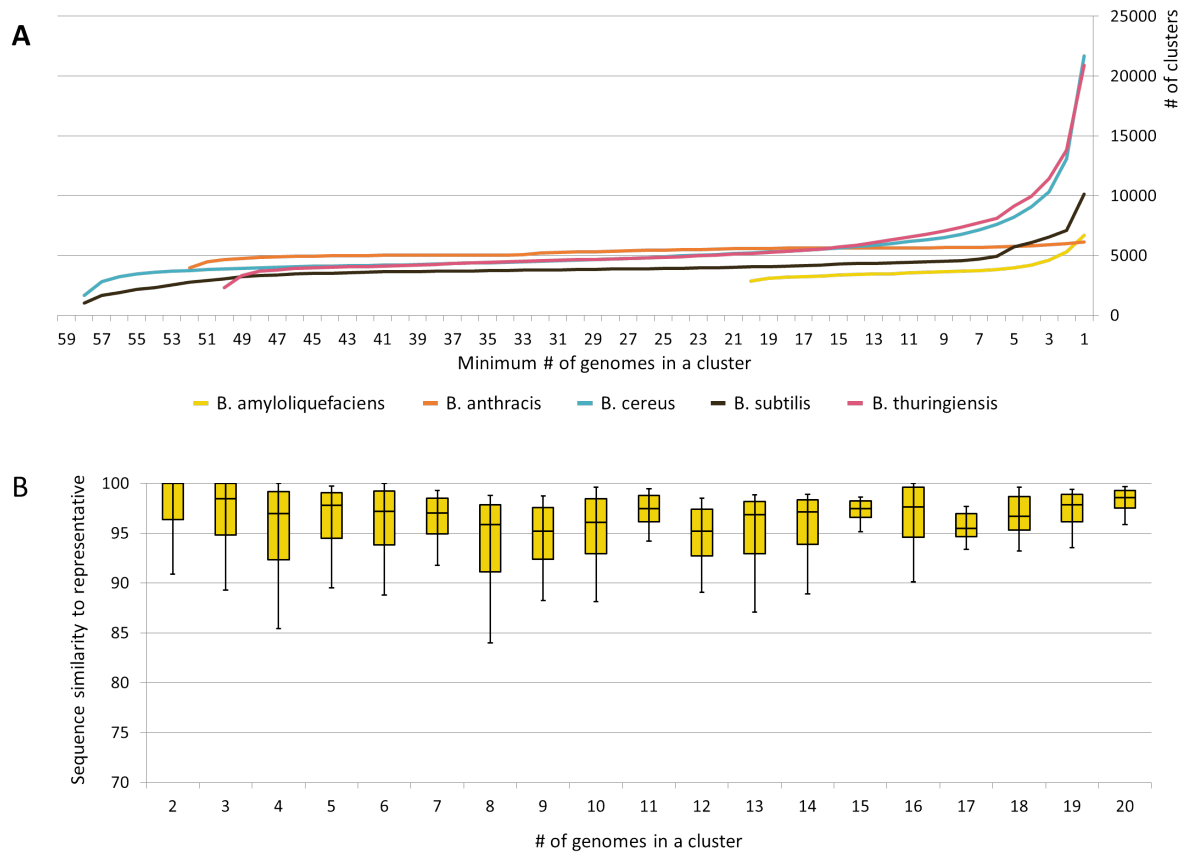

**Supplementary Figure S2.** Pan-genomes in five *Bacillus* species. (A) Total number of orthologous gene clusters with respect to the number of strains in a cluster. (B) Sequence similarity distribution of genes in each cluster of *B. amyloliquefaciens* with respect to the number of strains in a cluster.

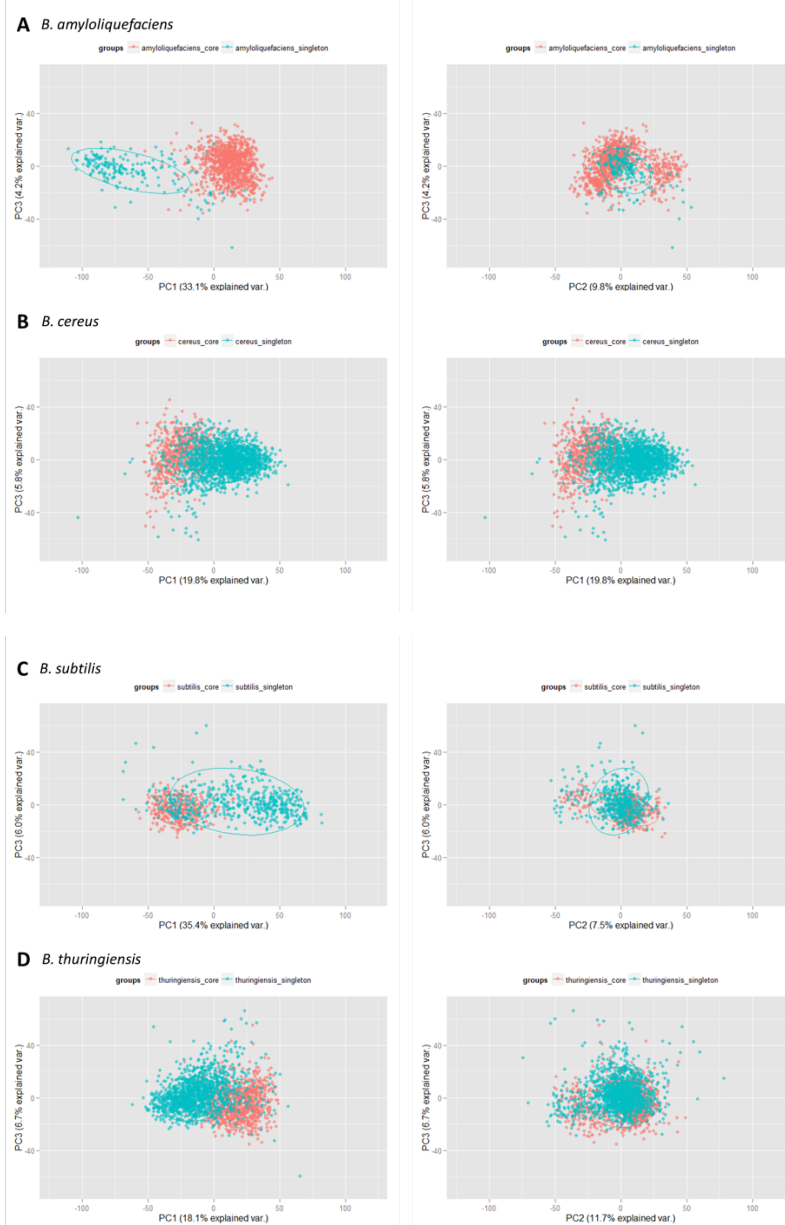

**Supplementary Figure S3.** Comparison of the genomic signatures (containing PC3) in core and strain-specific genes of *Bacillus* species.

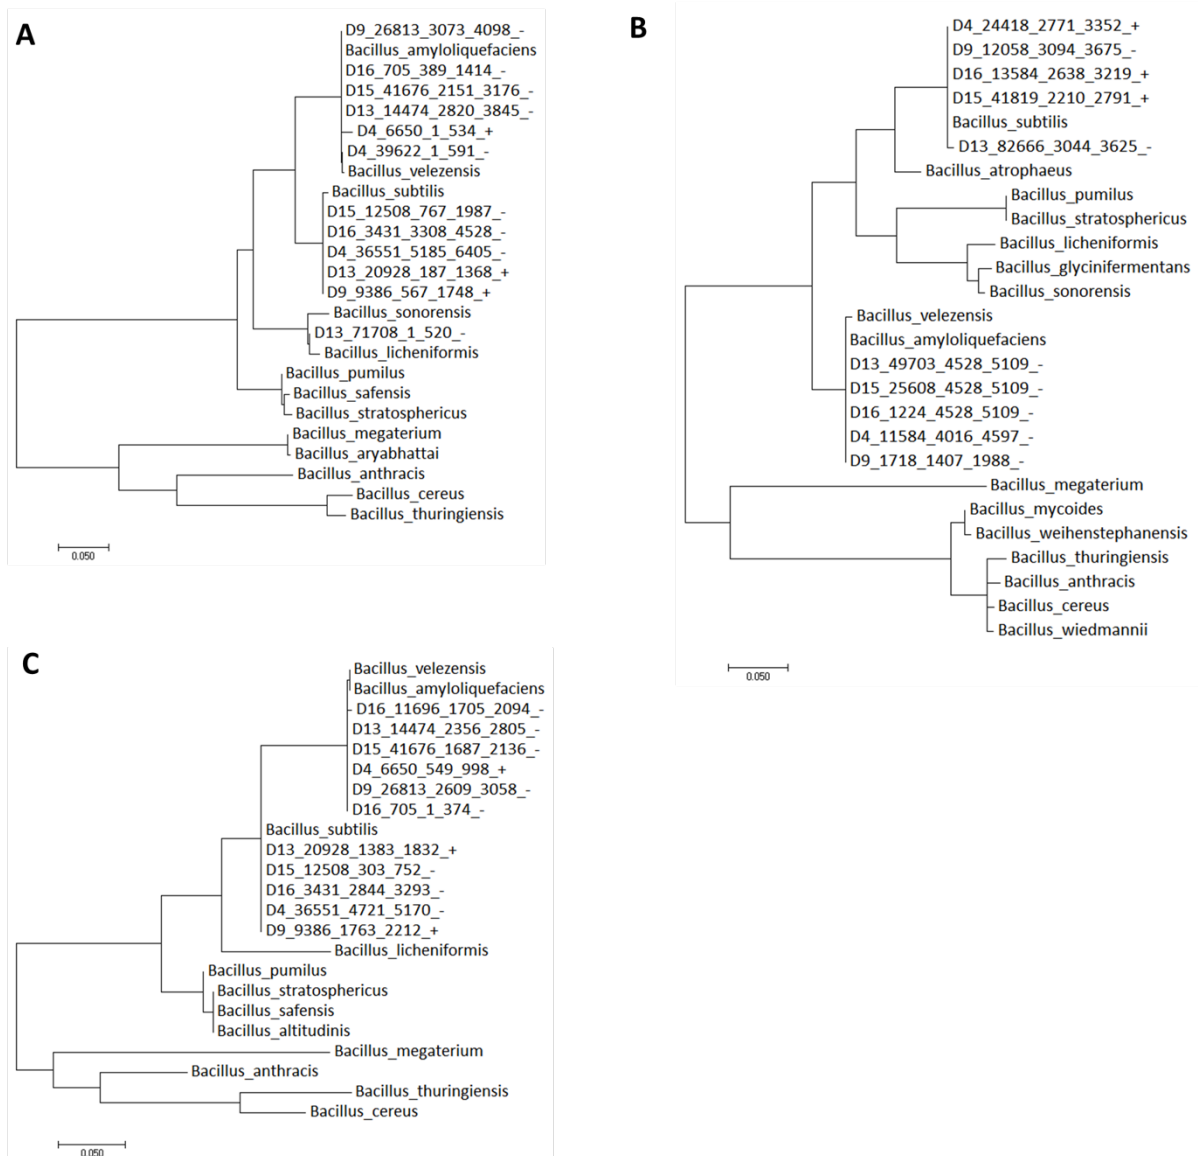

**Supplementary Figure S4.** Identification of *Bacillus* species in the *doenjang* microbiome. Phylogenetic trees of three *Bacillus* genes of (A) *pgsA*, (B) *pgsB*, (C) *pgsC* genes in five microbiomes D4, D9, D13, D15, and D16, along with the genes in the reference genomes.

## **Supplementary Table Legend**

**Supplementary Table S1.** List of *Bacillus* genomes analyzed.

**Supplementary Table S2.** Average similarity of dispensable and core genes in each orthologous gene cluster among species for the different clustering thresholds.

**Supplementary Table S3.** Pan-genomes of the five *Bacillus* species with clustering of 70% threshold.

**Supplementary Table S4.** The ratio of the core genes clustered with the genes predicted in the *doenjang* microbiomes.

**Supplementary Table S5.** Microbiome profiling using MetaPhlAn (based on the marker genes) of the *doenjang* microbiome.

**Supplementary Table S6.** Sample information of the *doenjang* microbiome.

**Supplementary Table S7.** Statistical analysis of differential enhancement of COG functions in core and strain-specific genes.

**Supplementary Table S1.** List of *Bacillus* genomes analyzed.

| strain                            | NCBI assembly   | # of genes | genome size (Mb) | GC%     |
|-----------------------------------|-----------------|------------|------------------|---------|
| <i>Bacillus amyloliquefaciens</i> |                 |            |                  |         |
| DSM 7                             | GCA_000196735.1 | 3922       | 3.9802           | 46.1    |
| TA208                             | GCA_000195515.1 | 4089       | 3.93751          | 45.8    |
| LL3                               | GCA_000204275.1 | 4228       | 4.00199          | 45.6938 |
| XH7                               | GCA_000221645.1 | 4190       | 3.9392           | 45.8    |
| IT-45                             | GCA_000242855.2 | 3860       | 3.93687          | 46.5876 |
| Y2                                | GCA_000262385.1 | 4238       | 4.23862          | 45.9    |
| CC178                             | GCA_000494835.1 | 3950       | 3.91683          | 46.5    |
| LFB112                            | GCA_000508265.1 | 3859       | 3.94275          | 46.7    |
| L-H15                             | GCA_000833005.1 | 3616       | 3.90597          | 46.7    |
| KHG19                             | GCA_000835145.1 | 3675       | 3.95336          | 46.6    |
| L-S60                             | GCA_000973485.1 | 3617       | 3.90302          | 46.7    |
| MBE1283                           | GCA_001483885.1 | 3680       | 3.97993          | 46.4873 |
| S499                              | GCA_001586105.1 | 3671       | 3.93593          | 46.5874 |
| UMAF6639                          | GCA_001593765.1 | 3920       | 4.03464          | 46.3    |
| UMAF6614                          | GCA_001593785.1 | 3894       | 4.00514          | 46.5    |
| B15                               | GCA_001596755.1 | 3704       | 4.00675          | 46.5    |
| RD7-7                             | GCA_001705195.1 | 3607       | 3.68821          | 46.3    |
| Y14                               | GCA_001874385.1 | 3717       | 3.95716          | 46.4    |
| LM2303                            | GCA_001889285.1 | 3739       | 3.98939          | 46.7    |
| WS-8                              | GCA_001922005.1 | 3670       | 3.92979          | 46.5    |
| <i>B. anthracis</i>               |                 |            |                  |         |
| Ames                              | GCA_000007845.1 | 5330       | 5.22729          | 35.4    |
| Sterne                            | GCA_000008165.1 | 5287       | 5.22866          | 35.4    |
| CDC 684                           | GCA_000021445.1 | 5896       | 5.50676          | 35.2646 |
| A0248                             | GCA_000022865.1 | 5291       | 5.50393          | 35.2629 |
| H9401                             | GCA_000258885.1 | 5791       | 5.49547          | 35.2644 |
| A16                               | GCA_000512835.2 | 5530       | 5.50545          | 35.2629 |
| SVA11                             | GCA_000583105.1 | 5741       | 5.48752          | 35.2625 |
| HYU01                             | GCA_000725325.1 | 5317       | 5.49012          | 35.2642 |
| 2000031021                        | GCA_000742655.1 | 5509       | 5.33174          | 35.3573 |
| Vollum                            | GCA_000742895.1 | 5732       | 5.50619          | 35.2646 |
| Ames A0462                        | GCA_000830095.1 | 5529       | 5.50391          | 35.2646 |
| PAK-1                             | GCA_000832425.1 | 5602       | 5.40338          | 35.3025 |
| Vollum 1B                         | GCA_000832445.1 | 5732       | 5.50663          | 35.2646 |
| K3                                | GCA_000832465.1 | 5695       | 5.50499          | 35.2648 |
| Ohio ACB                          | GCA_000832505.1 | 5700       | 5.49834          | 35.2647 |
| SK-102                            | GCA_000832565.1 | 5717       | 5.50566          | 35.2652 |



|                                    |                 |      |         |         |
|------------------------------------|-----------------|------|---------|---------|
| Pasteur                            | GCA_000832585.1 | 5472 | 5.2948  | 35.3571 |
| BA1015                             | GCA_000832665.1 | 5687 | 5.49118 | 35.2643 |
| BA1035                             | GCA_000832725.1 | 5746 | 5.48726 | 35.2624 |
| RA3                                | GCA_000832745.1 | 5757 | 5.48987 | 35.2625 |
| V770-NP-1R                         | GCA_000832785.1 | 5589 | 5.4104  | 35.3026 |
| 2002013094                         | GCA_000832965.1 | 5723 | 5.60108 | 35.2672 |
| Canadian_bison                     | GCA_000833125.1 | 5706 | 5.50577 | 35.2647 |
| Turkey32                           | GCA_000833275.1 | 5711 | 5.5053  | 35.2646 |
| A1144                              | GCA_000875715.1 | 5525 | 5.47706 | 35.2621 |
| Stendal                            | GCA_001543225.1 | 5536 | 5.50345 | 35.2629 |
| Tangail-1                          | GCA_001654475.1 | 5524 | 5.5038  | 35.2629 |
| Parent2                            | GCA_001683065.1 | 5295 | 5.22709 | 35.4    |
| Parent1                            | GCA_001683095.1 | 5302 | 5.22866 | 35.4    |
| PR01                               | GCA_001683135.1 | 5301 | 5.22866 | 35.4    |
| PR02                               | GCA_001683155.1 | 5301 | 5.22866 | 35.4    |
| PR05                               | GCA_001683175.1 | 5300 | 5.22866 | 35.4    |
| PR06                               | GCA_001683195.1 | 5302 | 5.22866 | 35.4    |
| PR07                               | GCA_001683215.1 | 5296 | 5.22709 | 35.4    |
| PR08                               | GCA_001683235.1 | 5296 | 5.22709 | 35.4    |
| PR09-1                             | GCA_001683255.1 | 5294 | 5.22706 | 35.4    |
| PR09-4                             | GCA_001683275.1 | 5295 | 5.22709 | 35.4    |
| PR10-4                             | GCA_001683295.1 | 5294 | 5.22708 | 35.4    |
| Tyrol 4675                         | GCA_001936375.1 | 5693 | 5.50404 | 35.2647 |
| SPV842_15                          | GCA_001990245.1 | 5634 | 5.41035 | 35.3026 |
| delta Sterne                       | GCA_000742695.1 | 5479 | 5.22965 | 35.4    |
| BFV                                | GCA_000742875.1 | 5702 | 5.50835 | 35.2705 |
| A0157                              | GCA_000808075.1 | 5349 | 5.32224 | 35.4555 |
| Pollino                            | GCA_000831505.1 | 5536 | 5.50389 | 35.2629 |
| Larissa                            | GCA_001277955.1 | 5541 | 5.50329 | 35.263  |
| 8903-G                             | GCA_000558965.1 | 5500 | 5.50477 | 35.2647 |
| 9080-G                             | GCA_000558985.1 | 5605 | 5.50866 | 35.2631 |
| 52-G                               | GCA_000559005.1 | 5517 | 5.50444 | 35.2647 |
| Smith 1013                         | GCA_000742315.1 | 5564 | 5.28699 | 35.2806 |
| A16R                               | GCA_000512775.1 | 5276 | 5.40945 | 35.3026 |
| Cvac02                             | GCA_000747335.1 | 5382 | 5.22717 | 35.4    |
| Han                                | GCA_000747375.1 | 5513 | 5.22543 | 35.4    |
| <hr/> <i>Bacillus cerues</i> <hr/> |                 |      |         |         |
| ATCC 14579                         | GCA_000007825.1 | 5255 | 5.42708 | 35.3076 |
| ATCC 10987                         | GCA_000008005.1 | 5844 | 5.43265 | 35.5156 |
| Q1                                 | GCA_000013065.1 | 5502 | 5.50621 | 35.504  |
| B4264                              | GCA_000021205.1 | 5398 | 5.41904 | 35.3    |

|            |                 |      |         |         |
|------------|-----------------|------|---------|---------|
| AH187      | GCA_000021225.1 | 5783 | 5.59986 | 35.5213 |
| G9842      | GCA_000021305.1 | 5857 | 5.73682 | 35.0479 |
| AH820      | GCA_000021785.1 | 5810 | 5.58883 | 35.3086 |
| 03BB102    | GCA_000022505.1 | 5606 | 5.44931 | 35.2945 |
| CI         | GCA_000143605.1 | 5558 | 5.48665 | 35.2707 |
| NC7401     | GCA_000283675.1 | 5761 | 5.55203 | 35.5372 |
| FRI-35     | GCA_000292415.1 | 5435 | 5.38232 | 35.4535 |
| A1         | GCA_000635895.2 | 5418 | 5.73461 | 35.135  |
| 03BB87     | GCA_000789315.1 | 5788 | 5.71894 | 35.1791 |
| D17        | GCA_000832385.1 | 5651 | 5.59036 | 35.3171 |
| FM1        | GCA_000832525.1 | 5592 | 5.69776 | 35.2951 |
| 3a         | GCA_000832765.1 | 5669 | 5.6423  | 35.2618 |
| G9241      | GCA_000832805.1 | 5683 | 5.72007 | 35.1812 |
| ATCC 4342  | GCA_000832845.1 | 5268 | 5.3063  | 35.3674 |
| 03BB108    | GCA_000832865.1 | 6130 | 6.06873 | 34.9176 |
| E33L       | GCA_000833045.1 | 5838 | 5.84678 | 35.1686 |
| S2-8       | GCA_000835185.1 | 5674 | 5.64247 | 35.2618 |
| FORC_005   | GCA_000978375.1 | 5170 | 5.34962 | 35.3    |
| NJ-W       | GCA_001277915.1 | 5277 | 5.39851 | 35.1782 |
| FORC_013   | GCA_001518875.1 | 5683 | 5.67866 | 35.1948 |
| CMCC P0021 | GCA_001635915.1 | 5829 | 6.11289 | 34.9099 |
| CMCC P0011 | GCA_001635955.1 | 5828 | 6.09799 | 34.9092 |
| HN001      | GCA_001635995.1 | 5779 | 5.98083 | 34.921  |
| FORC_024   | GCA_001721145.1 | 5238 | 5.43012 | 35.3    |
| FORC021    | GCA_002000005.1 | 5418 | 5.37329 | 35.3101 |
| BC-AK      | GCA_002117465.1 | 5783 | 5.78633 | 35.3377 |
| 25         | GCA_002117835.1 | 4931 | 4.82659 | 35.1    |
| 29         | GCA_002117855.1 | 5107 | 4.99789 | 35.3    |
| m1293      | GCA_000003645.1 | 5282 | 5.26973 | 35.3501 |
| AH1273     | GCA_000003955.1 | 5798 | 5.7905  | 35.2502 |
| ATCC 10876 | GCA_000160895.1 | 5861 | 5.93902 | 34.8    |
| BGSC 6E1   | GCA_000160915.1 | 5687 | 5.73018 | 35      |
| 172560W    | GCA_000160935.1 | 5641 | 5.69954 | 34.8    |
| MM3        | GCA_000160955.1 | 5553 | 5.54706 | 35.2    |
| AH621      | GCA_000160975.1 | 5667 | 5.67481 | 35.2    |
| R309803    | GCA_000160995.1 | 5587 | 5.58625 | 35.4    |
| m1550      | GCA_000161035.1 | 5245 | 5.24649 | 35.1    |
| BDRD-ST24  | GCA_000161055.1 | 5417 | 5.43617 | 35.1    |
| BDRD-ST196 | GCA_000161095.1 | 5549 | 5.57657 | 35.2    |
| BDRD-Cer4  | GCA_000161115.1 | 5372 | 5.39745 | 35.1    |
| Rock1-3    | GCA_000161155.1 | 5815 | 5.85985 | 34.9    |

|           |                 |      |         |         |
|-----------|-----------------|------|---------|---------|
| Rock1-15  | GCA_000161175.1 | 5787 | 5.76628 | 34.9    |
| Rock3-29  | GCA_000161215.1 | 5868 | 5.87811 | 34.9    |
| Rock3-42  | GCA_000161235.1 | 5313 | 5.2029  | 35.2    |
| Rock3-44  | GCA_000161255.1 | 4750 | 4.9998  | 36.7505 |
| Rock4-2   | GCA_000161275.1 | 5715 | 5.76999 | 34.9    |
| F65185    | GCA_000161315.1 | 6027 | 6.13318 | 34.7    |
| AH603     | GCA_000161335.1 | 5799 | 5.79945 | 35.1    |
| AH676     | GCA_000161355.1 | 5612 | 5.59475 | 35      |
| AH1271    | GCA_000161375.1 | 5666 | 5.6567  | 35.3    |
| AH1272    | GCA_000161395.1 | 5810 | 5.78954 | 35.2    |
| FT9       | GCA_000724585.1 | 4278 | 5.22366 | 35.5    |
| BDRD-ST26 | GCA_000161075.1 | 5778 | 5.56803 | 35.2    |
| Rock3-28  | GCA_000161195.1 | 5728 | 6.0415  | 35      |

---

*Bacillus subtilis*

---

|                     |                 |      |         |         |
|---------------------|-----------------|------|---------|---------|
| W23                 | GCA_000146565.1 | 4063 | 4.02768 | 43.9    |
| BSn5                | GCA_000186745.1 | 4145 | 4.0936  | 43.8    |
| BEST195             | GCA_000209795.2 | 4477 | 4.11122 | 43.4962 |
| TU-B-10             | GCA_000227465.1 | 4297 | 4.20722 | 43.8    |
| RO-NN-1             | GCA_000227485.1 | 4101 | 4.01195 | 43.9    |
| QB928               | GCA_000293765.1 | 4034 | 4.14684 | 43.6    |
| BSP1                | GCA_000321395.1 | 3847 | 4.04375 | 43.9    |
| XF-1                | GCA_000338735.1 | 3853 | 4.06119 | 43.9    |
| 6051-HGW            | GCA_000344745.1 | 4188 | 4.21561 | 43.5    |
| BAB-1               | GCA_000349795.1 | 4003 | 4.02194 | 43.9    |
| PY79                | GCA_000497485.1 | 4138 | 4.03346 | 43.8    |
| BEST7003            | GCA_000523045.1 | 4011 | 4.04304 | 43.9    |
| JH642 substr. AG174 | GCA_000699465.1 | 4227 | 4.18837 | 43.5    |
| AG1839              | GCA_000699525.1 | 4231 | 4.19364 | 43.5    |
| OH 131.1            | GCA_000706705.1 | 3885 | 4.03916 | 43.8    |
| TO-A                | GCA_000737405.1 | 4083 | 4.05749 | 43.8    |
| ATCC 13952          | GCA_000772125.1 | 3852 | 3.87628 | 45.8    |
| ATCC 19217          | GCA_000772165.1 | 3677 | 3.9599  | 46.4    |
| Bs-916              | GCA_000772205.1 | 3741 | 3.98167 | 46.5    |
| SG6                 | GCA_000782835.1 | 4017 | 4.07967 | 43.8    |
| 168                 | GCA_000789275.1 | 4307 | 4.21562 | 43.5    |
| PS832               | GCA_000789295.1 | 4299 | 4.21537 | 43.5    |
| 3NA                 | GCA_000827065.1 | 4277 | 4.1951  | 43.6    |
| BS49                | GCA_000953615.1 | 4248 | 4.25165 | 43.5    |
| KCTC 1028           | GCA_000971925.1 | 4303 | 4.21563 | 43.5    |
| HJ5                 | GCA_000973605.1 | 3917 | 4.01293 | 43.8    |
| UD1022              | GCA_001015095.1 | 3933 | 4.02533 | 43.9    |

|                |                                   |      |         |         |
|----------------|-----------------------------------|------|---------|---------|
| TO-A JPC       | GCA_001037985.1                   | 4231 | 4.09071 | 43.8    |
| BSD-2          | GCA_001465815.1                   | 3951 | 4.03084 | 43.9    |
| DE111          | GCA_001534785.1                   | 4066 | 4.14389 | 43.9    |
| CU1050         | GCA_001541905.1                   | 4064 | 4.05628 | 43.9    |
| CGMCC 2108     | GCA_001565875.1                   | 4182 | 4.19375 | 43.407  |
| ATCC 49760     | GCA_001597265.1                   | 3950 | 4.17548 | 43.2    |
| SZMC 6179J     | GCA_001604995.1                   | 4276 | 4.1952  | 43.6    |
| delta6         | GCA_001660525.1                   | 3928 | 3.87692 | 43.9    |
| KCTC 3135      | GCA_001697265.1                   | 4301 | 4.21134 | 43.5    |
| 168G           | GCA_001703495.1                   | 4297 | 4.21481 | 43.5    |
| HJ0-6          | GCA_001704095.1                   | 4245 | 4.23512 | 43.5    |
| BS16045        | GCA_001720505.1                   | 4192 | 4.16512 | 43.6    |
| BS38           | GCA_001746575.1                   | 4159 | 4.01042 | 43.6    |
| HRBS-10TDI13   | GCA_001747445.1                   | 4135 | 4.19542 | 43.2906 |
| VV2            | GCA_001808235.1                   | 3921 | 4.01382 | 43.9    |
| J-5            | GCA_001889385.1                   | 3917 | 4.1179  | 46.1    |
| MJ01           | GCA_001889625.1                   | 4027 | 4.10829 | 43.9    |
| KH2            | GCA_001890405.1                   | 4222 | 4.21243 | 43.4049 |
| 29R7-12        | GCA_001902555.1                   | 4187 | 4.20405 | 43.4008 |
| NCIB 3610      | GCA_002055965.1                   | 4335 | 4.29982 | 43.3355 |
| GQJK2          | GCA_002072735.1                   | 3976 | 4.07296 | 43.8    |
| Bs-115         | GCA_002096095.1                   | 4037 | 4.14259 | 43.5    |
| B-1            | GCA_000769515.1                   | 3706 | 3.94145 | 46.5    |
| QB5412         | GCA_001750745.1                   | 4300 | 4.21795 | 43.5    |
| NRS 231        | GCA_000816805.1<br>(contaminated) | 3968 | 4.02767 | 43.9    |
| T30            | GCA_000959025.1<br>(contaminated) | 3896 | 4.03173 | 43.9    |
| D12-5          | GCA_001596535.1                   | 3746 | 4.14264 | 43.6    |
| IIG-Bs27-47-24 | GCA_001698485.1                   | 2902 | 2.90231 | 44.3    |
| PG10           | GCA_001698505.1                   | 2756 | 2.7593  | 44.2    |
| PS38           | GCA_001698525.1                   | 2691 | 2.68033 | 44.1    |
| QB5413         | GCA_001750765.1                   | 5099 | 4.21796 | 42.7    |

---

*Bacillus thuringiensis*

---

|            |                 |      |         |         |
|------------|-----------------|------|---------|---------|
| 97-27      | GCA_000833085.1 | 5327 | 5.31269 | 35.3595 |
| Al Hakam   | GCA_000015065.1 | 4798 | 5.31303 | 35.4084 |
| ATCC 10792 | GCA_000161615.1 | 6243 | 6.26014 | 34.8    |
| Bc601      | GCA_001618665.1 | 5931 | 6.11129 | 35.0942 |
| BGSC 4AA1  | GCA_000940785.1 | 6011 | 6.1799  | 35.0858 |
| BGSC 4AJ1  | GCA_000161595.1 | 6490 | 6.48902 | 34.7    |
| BGSC 4AW1  | GCA_000161635.1 | 5546 | 5.48884 | 35.1    |
| BGSC 4BA1  | GCA_000161655.1 | 6053 | 6.03148 | 34.9    |

|                                   |                 |      |         |         |
|-----------------------------------|-----------------|------|---------|---------|
| BGSC 4BD1                         | GCA_000161675.1 | 6019 | 6.2312  | 34.6501 |
| BGSC 4C1                          | GCA_001640965.1 | 5626 | 5.81812 | 35.2064 |
| BGSC 4CC1                         | GCA_000161695.1 | 5944 | 6.0026  | 34.9    |
| BGSC 4Y1                          | GCA_000161475.1 | 5732 | 5.62591 | 34.9    |
| BMB171                            | GCA_000092165.1 | 5349 | 5.64305 | 35.1891 |
| Bt18247                           | GCA_001721165.1 | 6210 | 6.1382  | 35.1552 |
| Bt185                             | GCA_001595725.1 | 5894 | 6.3905  | 34.8215 |
| Bt407                             | GCA_000306745.1 | 6402 | 6.13434 | 35.0166 |
| CT-43                             | GCA_000193355.1 | 6206 | 6.15115 | 35.1212 |
| CTC                               | GCA_001455345.1 | 5307 | 5.35293 | 35.3976 |
| HD 1                              | GCA_000835235.1 | 6957 | 6.85947 | 34.8925 |
| HD-1                              | GCA_000717535.1 | 6782 | 6.76659 | 34.9182 |
| HD1002                            | GCA_000835025.1 | 6665 | 6.5727  | 35.0677 |
| HD1011                            | GCA_000832485.1 | 6088 | 6.09337 | 35.1468 |
| HD12                              | GCA_001598095.1 | 6192 | 6.49046 | 35.1836 |
| HD-29                             | GCA_000803665.1 | 6522 | 6.74223 | 34.9557 |
| HD521                             | GCA_001183785.1 | 6172 | 6.19845 | 34.9666 |
| HD571                             | GCA_000832825.1 | 5339 | 5.31218 | 35.4084 |
| HD682                             | GCA_000832925.1 | 5292 | 5.29139 | 35.4811 |
| HD73                              | GCA_000338755.1 | 6194 | 5.90857 | 35.1904 |
| HD-771                            | GCA_000292455.1 | 6569 | 6.43837 | 35.0432 |
| HD-789                            | GCA_000292705.1 | 6462 | 6.33463 | 35.1765 |
| HS18-1                            | GCA_001182785.1 | 6127 | 6.40346 | 34.9753 |
| IBL 200                           | GCA_000161715.1 | 6693 | 6.73179 | 34.5    |
| IBL 4222                          | GCA_000161735.1 | 6658 | 6.61243 | 34.8501 |
| IS5056                            | GCA_000341665.1 | 6922 | 6.77159 | 34.905  |
| KNU-07                            | GCA_001692675.1 | 5743 | 6.15274 | 34.8926 |
| L-7601                            | GCA_002025105.1 | 6179 | 6.30377 | 35.052  |
| MC28                              | GCA_000300475.1 | 6557 | 6.69453 | 34.9245 |
| MYBT18246                         | GCA_001685565.1 | 7089 | 6.75249 | 35.3991 |
| Pasteur Institute Standard strain | GCA_001548175.1 | 7044 | 6.87059 | 35.0603 |
| ST7                               | GCA_001675515.1 | 5675 | 6.28612 | 35.1242 |
| T01001                            | GCA_000161515.1 | 6323 | 6.32312 | 34.8    |
| T03a001                           | GCA_000161575.1 | 5556 | 5.52757 | 35      |
| T04001                            | GCA_000161535.1 | 6583 | 6.10775 | 34.6    |
| T13001                            | GCA_000161555.1 | 6028 | 6.03751 | 35      |
| XL6                               | GCA_000774075.2 | 5534 | 5.70184 | 34.6308 |
| YBT-020                           | GCA_000190515.1 | 5782 | 5.68238 | 35.3815 |
| YBT-1518                          | GCA_000497525.2 | 6738 | 6.67292 | 35.2915 |
| YBT-1520                          | GCA_000747545.1 | 6816 | 6.52041 | 34.9377 |
| YC-10                             | GCA_001017635.1 | 6508 | 6.78414 | 34.9011 |

YWC2-8

GCA\_001420855.1

6193

6.22794

35.0998

---

**Supplementary Table S2.** Average similarity of dispensable and core genes in each orthologous gene cluster among species for the different clustering thresholds.

| Similarity (%)<br>/length aligned<br>(bp) | Dispensable genes |       |       | Core genes |       |       |
|-------------------------------------------|-------------------|-------|-------|------------|-------|-------|
|                                           | min               | avg   | max   | min        | avg   | max   |
| 50/50                                     | 86.66             | 91.61 | 98.57 | 92.30      | 94.76 | 98.27 |
| 60/60                                     | 91.05             | 94.26 | 99.39 | 94.33      | 96.21 | 99.32 |
| 70/70                                     | 92.87             | 95.44 | 99.53 | 95.60      | 96.97 | 99.67 |
| 80/80                                     | 94.51             | 96.57 | 99.66 | 96.41      | 97.61 | 99.84 |
| 90/90                                     | 96.84             | 97.93 | 99.77 | 97.45      | 98.52 | 99.90 |

**Supplementary Table S3.** Pan-genomes of the five *Bacillus* species with clustering of 70% threshold.

| # of genome | <i>Bacillus amyloliquefaciens</i> |                    | <i>Bacillus anthracis</i> |                    | <i>Bacillus cereus</i> |                    | <i>Bacillus subtilis</i> |                    | <i>Bacillus thuringiensis</i> |                    |
|-------------|-----------------------------------|--------------------|---------------------------|--------------------|------------------------|--------------------|--------------------------|--------------------|-------------------------------|--------------------|
|             | # of cluster                      | average similarity | # of clusters             | average similarity | # of clusters          | average similarity | # of clusters            | average similarity | # of clusters                 | average similarity |
| 1           | 1364                              |                    | 156                       |                    | 8617                   |                    | 3013                     |                    | 7087                          |                    |
| 2           | 703                               | 96.82              | 82                        | 99.98              | 2768                   | 94.82              | 551                      | 93.91              | 2364                          | 94.85              |
| 3           | 384                               | 95.80              | 113                       | 99.43              | 1222                   | 93.05              | 463                      | 95.51              | 1500                          | 95.02              |
| 4           | 235                               | 94.73              | 48                        | 99.79              | 883                    | 92.55              | 378                      | 95.38              | 812                           | 93.34              |
| 5           | 146                               | 96.11              | 41                        | 99.74              | 582                    | 92.50              | 772                      | 95.69              | 997                           | 96.31              |
| 6           | 73                                | 95.55              | 18                        | 99.24              | 446                    | 92.26              | 234                      | 93.28              | 403                           | 92.88              |
| 7           | 66                                | 95.38              | 16                        | 99.03              | 389                    | 92.09              | 143                      | 96.57              | 359                           | 93.42              |
| 8           | 42                                | 93.86              | 12                        | 99.71              | 260                    | 91.59              | 59                       | 92.56              | 322                           | 93.29              |
| 9           | 47                                | 94.37              | 12                        | 99.84              | 190                    | 91.60              | 47                       | 91.58              | 272                           | 93.94              |
| 10          | 62                                | 94.73              | 7                         | 99.65              | 169                    | 90.87              | 46                       | 91.81              | 230                           | 93.19              |
| 11          | 58                                | 96.56              | 5                         | 99.53              | 150                    | 91.31              | 20                       | 93.68              | 246                           | 93.23              |
| 12          | 28                                | 94.50              | 5                         | 99.62              | 135                    | 91.01              | 53                       | 93.02              | 197                           | 93.01              |
| 13          | 29                                | 95.59              | 6                         | 99.67              | 129                    | 91.09              | 23                       | 91.66              | 227                           | 94.08              |
| 14          | 47                                | 95.52              | 6                         | 100.00             | 107                    | 92.25              | 51                       | 96.84              | 161                           | 94.27              |
| 15          | 96                                | 96.87              | 3                         | 99.93              | 96                     | 91.75              | 60                       | 97.70              | 166                           | 95.42              |
| 16          | 39                                | 96.26              | 4                         | 99.94              | 97                     | 90.88              | 45                       | 96.20              | 94                            | 92.23              |
| 17          | 47                                | 95.31              | 4                         | 99.63              | 69                     | 92.36              | 55                       | 95.67              | 91                            | 91.06              |
| 18          | 92                                | 96.37              | 9                         | 100.00             | 72                     | 91.40              | 39                       | 96.51              | 101                           | 91.12              |
| 19          | 228                               | 97.11              | 4                         | 100.00             | 71                     | 90.42              | 31                       | 93.96              | 75                            | 92.53              |
| 20          | 2870                              | 98.03              | 12                        | 98.30              | 70                     | 92.21              | 33                       | 95.38              | 86                            | 91.56              |



|    |     |       |    |       |    |       |     |       |
|----|-----|-------|----|-------|----|-------|-----|-------|
| 21 | 38  | 99.31 | 72 | 90.46 | 32 | 96.80 | 65  | 90.98 |
| 22 | 30  | 99.62 | 56 | 91.33 | 23 | 95.32 | 59  | 91.56 |
| 23 | 28  | 99.19 | 72 | 91.76 | 18 | 97.35 | 62  | 91.61 |
| 24 | 30  | 99.58 | 74 | 91.07 | 19 | 92.68 | 60  | 92.44 |
| 25 | 25  | 99.59 | 69 | 90.69 | 23 | 94.85 | 58  | 91.13 |
| 26 | 43  | 99.57 | 55 | 91.45 | 17 | 94.18 | 43  | 91.93 |
| 27 | 36  | 99.65 | 58 | 89.88 | 14 | 94.69 | 45  | 90.77 |
| 28 | 35  | 99.29 | 44 | 89.97 | 22 | 94.80 | 35  | 91.03 |
| 29 | 26  | 99.61 | 51 | 91.87 | 21 | 96.18 | 31  | 91.27 |
| 30 | 44  | 99.80 | 40 | 89.41 | 16 | 95.45 | 39  | 91.69 |
| 31 | 47  | 98.99 | 41 | 89.59 | 16 | 96.30 | 27  | 92.61 |
| 32 | 143 | 99.67 | 36 | 91.25 | 17 | 95.92 | 39  | 92.48 |
| 33 | 11  | 99.73 | 41 | 91.42 | 20 | 94.91 | 38  | 91.46 |
| 34 | 7   | 99.78 | 45 | 89.15 | 16 | 91.84 | 49  | 92.33 |
| 35 | 4   | 99.77 | 37 | 92.96 | 16 | 95.73 | 58  | 92.30 |
| 36 | 5   | 93.64 | 36 | 90.16 | 13 | 93.24 | 60  | 91.97 |
| 37 | 4   | 99.25 | 50 | 89.38 | 13 | 96.71 | 67  | 93.70 |
| 38 | 3   | 99.72 | 32 | 90.07 | 20 | 95.55 | 55  | 93.16 |
| 39 | 3   | 99.96 | 39 | 91.36 | 14 | 91.33 | 42  | 92.63 |
| 40 | 10  | 99.96 | 24 | 89.51 | 30 | 91.80 | 46  | 92.61 |
| 41 | 4   | 99.74 | 27 | 90.59 | 30 | 93.43 | 40  | 90.41 |
| 42 | 8   | 99.85 | 27 | 91.66 | 40 | 94.03 | 35  | 93.36 |
| 43 | 15  | 98.66 | 22 | 90.85 | 40 | 93.27 | 33  | 91.05 |
| 44 | 24  | 99.76 | 26 | 89.94 | 26 | 92.88 | 44  | 93.39 |
| 45 | 37  | 98.93 | 39 | 92.30 | 43 | 92.02 | 62  | 92.86 |
| 46 | 49  | 99.13 | 37 | 91.83 | 53 | 93.98 | 103 | 92.66 |
| 47 | 46  | 99.63 | 39 | 89.81 | 78 | 94.91 | 121 | 93.88 |

|       |      |       |      |       |       |       |       |       |       |       |
|-------|------|-------|------|-------|-------|-------|-------|-------|-------|-------|
| 48    |      |       | 84   | 99.41 | 50    | 91.42 | 95    | 93.98 | 335   | 94.00 |
| 49    |      |       | 97   | 99.28 | 46    | 90.08 | 149   | 93.87 | 1042  | 95.34 |
| 50    |      |       | 180  | 99.46 | 57    | 89.47 | 168   | 94.26 | 2299  | 95.85 |
| 51    |      |       | 484  | 99.70 | 67    | 91.66 | 135   | 93.34 |       |       |
| 52    |      |       | 3972 | 99.67 | 70    | 91.36 | 237   | 93.36 |       |       |
| 53    |      |       |      |       | 78    | 91.14 | 210   | 92.72 |       |       |
| 54    |      |       |      |       | 124   | 92.69 | 149   | 93.54 |       |       |
| 55    |      |       |      |       | 234   | 92.57 | 287   | 94.47 |       |       |
| 56    |      |       |      |       | 445   | 92.61 | 213   | 94.23 |       |       |
| 57    |      |       |      |       | 1137  | 94.01 | 645   | 94.92 |       |       |
| 58    |      |       |      |       | 1656  | 95.70 | 1022  | 95.60 |       |       |
| total | 6656 | 97.14 | 6135 | 99.62 | 21675 | 93.23 | 10116 | 94.71 | 20882 | 94.46 |

<sup>+</sup> # of clusters summed. <sup>\*</sup> the average similarity of the entire clusters.

**Supplementary Table S4.** The ratio of the core genes clustered with the genes predicted in the *doenjang* microbiomes.

| Similarity (%) | sample ID | <i>B. amyloliquefaciens</i> | <i>B. subtilis</i> | <i>B. thuringiensis</i> | <i>B. cereus</i> | <i>B. anthracis</i> |
|----------------|-----------|-----------------------------|--------------------|-------------------------|------------------|---------------------|
| 70             | D13       | 99.44                       | 99.80              | 21.01                   | 27.66            | 18.81               |
|                | D15       | 99.13                       | 99.41              | 16.79                   | 23.85            | 14.85               |
|                | D16       | 99.13                       | 99.71              | 20.14                   | 26.93            | 17.70               |
|                | D4        | 99.30                       | 99.80              | 21.44                   | 28.38            | 18.55               |
|                | D9        | 99.44                       | 99.80              | 23.75                   | 30.43            | 20.87               |
|                | Avg.      | 99.29                       | 99.71              | 20.63                   | 27.45            | 18.16               |
| 90             | D13       | 98.36                       | 97.26              | 1.21                    | 0.52             | 0.63                |
|                | D15       | 98.54                       | 96.38              | 1.03                    | 0.30             | 0.45                |
|                | D16       | 97.80                       | 98.73              | 1.33                    | 0.52             | 0.70                |
|                | D4        | 97.70                       | 97.70              | 0.65                    | 1.57             | 0.98                |
|                | D9        | 98.68                       | 98.68              | 2.29                    | 1.22             | 1.51                |
|                | Avg.      | 98.22                       | 97.77              | 1.30                    | 0.83             | 0.86                |

**Supplementary Table S5.** Microbiome profiling using MetaPhlAn (based on the marker genes) of the *doenjang* microbiome.

| ID                            | D13               | D15   | D16   | D4    | D9    |
|-------------------------------|-------------------|-------|-------|-------|-------|
| s__Bacillus_amyloliquefaciens | 7.99 <sup>+</sup> | 15.35 | 23.52 | 17.00 | 13.27 |
| s__Bacillus_coagulans         | 8.84              | 0     | 0     | 0     | 0     |
| s__Bacillus_licheniformis     | 10.33             | 11.29 | 13.08 | 17.59 | 19.86 |
| s__Bacillus_smithii           | 6.27              | 0     | 0     | 0     | 0     |
| s__Bacillus_sonorensis        | 9.78              | 3.70  | 0     | 17.93 | 13.17 |
| s__Bacillus_sp_BT1B_CT2       | 7.77              | 0     | 0     | 0     | 0     |
| s__Bacillus_subtilis          | 8.33              | 12.47 | 19.79 | 13.78 | 12.66 |
| s__Bacillus_vallismortis      | 0                 | 0.63  | 0     | 0     | 0     |
| s__Bacillus_phage_phiNIT1     | 0                 | 0     | 27.14 | 0     | 0     |

<sup>+</sup>the proportion is represented as a percentage.

**Supplementary Table S6.** Sample information of the *doenjang* microbiome.

| ID                | D13        | D15        | D16        | D4         | D9         |
|-------------------|------------|------------|------------|------------|------------|
| Read count        | 82,190,136 | 72,332,136 | 76,172,238 | 82,045,316 | 94,990,796 |
| Base pairs (Gbps) | 8.3        | 7.3        | 7.7        | 8.2        | 9.6        |

**Supplementary Table S7.** Statistical analysis of differential enhancement of COG functions in core and strain-specific genes.

|                                    | Class                                                         | Symbol | Enhanced group | p-value |
|------------------------------------|---------------------------------------------------------------|--------|----------------|---------|
| Cellular processing and signaling  | Cell cycle control, cell division, chromosome partitioning    | D      | Core           | 0.0343  |
|                                    | Cell wall/membrane/envelope biogenesis                        | M      |                | 0.6072  |
|                                    | Cell motility                                                 | N      |                | 0.8950  |
|                                    | Posttranslational modification, protein turnover, chaperones  | O      | Core           | 0.0095  |
|                                    | Signal transduction mechanisms                                | T      |                | 0.2068  |
|                                    | Intracellular trafficking, secretion, and vesicular transport | U      |                | 0.6513  |
|                                    | Defense mechanisms                                            | V      | Strain         | 0.0281  |
|                                    | Extracellular structures                                      | W      |                | 0.2258  |
|                                    | Cytoskeleton                                                  | Z      | Core           | 0.0270  |
| Information storage and processing | RNA processing and modification                               | A      |                | 0.2050  |
|                                    | Chromatin structure and dynamics                              | B      |                | 0.3832  |
|                                    | Translation, ribosomal structure and biogenesis               | J      | Core           | 0.0001  |
|                                    | Transcription                                                 | K      | Strain         | 0.0016  |
|                                    | Replication, recombination and repair                         | L      | Strain         | 1.E-05  |
| Metabolism                         | Energy production and conversion                              | C      | Core           | 6.E-05  |
|                                    | Amino acid transport and metabolism                           | E      | Core           | 0.0013  |
|                                    | Nucleotide transport and metabolism                           | F      |                | 0.5030  |
|                                    | Carbohydrate transport and metabolism                         | G      |                | 0.4203  |
|                                    | Coenzyme transport and metabolism                             | H      | Core           | 2.E-05  |
|                                    | Lipid transport and metabolism                                | I      |                | 0.0594  |
|                                    | Inorganic ion transport and metabolism                        | P      | Core           | 6.E-06  |
|                                    | Secondary metabolites biosynthesis, transport and catabolism  | Q      | Strain         | 0.0004  |
| Poorly characterized               | General function prediction only                              | R      |                | 0.2998  |
|                                    | Function unknown                                              | S      |                | 0.1274  |
| Mobilome                           | Mobileome                                                     | X      | Strain         | 0.0128  |
